# Rates of SARS-CoV-2 transmission between and into California state prisons

Preeti Dubey<sup>1</sup>, Christopher M. Hoover<sup>1</sup>, Phoebe Lu<sup>\*1</sup>, Seth Blumberg<sup>1,2</sup>, Travis C. Porco<sup>1</sup>,  
Todd L. Parsons<sup>3</sup>, and Lee Worden<sup>†1</sup>

<sup>1</sup>Francis I. Proctor Foundation, University of California, San Francisco, Calif., USA

<sup>2</sup>Department of Medicine, Division of Hospital Medicine, University of California, San  
Francisco, Calif., USA

<sup>3</sup>CNRS & Laboratoire de Probabilités, Statistique et Modélisation, Campus Pierre et  
Marie Curie, Sorbonne Université, Paris, France

## Abstract

Correctional institutions are a crucial hotspot amplifying SARS-CoV-2 spread and disease disparity in the U.S. In the California state prison system, multiple massive outbreaks have been caused by transmission between prisons. Correctional staff are a likely vector for transmission into the prison system from surrounding communities. We used publicly available data to estimate the magnitude of flows to and between California state prisons, estimating rates of transmission from communities to prison staff and residents, among and between residents and staff within facilities, and between staff and residents of distinct facilities in the state's 34 prisons through March 22, 2021. We use a mechanistic model, the Hawkes process, reflecting the dynamics of SARS-CoV-2 transmission, for joint estimation of transmission rates. Using nested models for hypothesis testing, we compared the results to simplified models (i) without transmission between prisons, and (ii) with no distinction

---

\*Current affiliation: Fielding School of Public Health, University of California, Los Angeles, Calif., USA

†Corresponding author: [worden.lee@gmail.com](mailto:worden.lee@gmail.com)

between prison staff and residents. We estimated that transmission between different facilities' staff is a significant cause of disease spread, and that staff are a vector of transmission between resident populations and outside communities. While increased screening and vaccination of correctional staff may help reduce introductions, large-scale decarceration remains crucially needed as more limited measures are not likely to prevent large-scale disease spread.

## 1 Introduction

Prisons and jails, like other dense congregate settings, have been exceptionally fertile ground for the SARS-CoV-2 virus since its introduction into the United States. Prisons were the sites of 27 outbreaks of over 2,000 COVID-19 cases each in the U.S. in the first year of the pandemic [1], and prison outbreaks continue to arise [2]. Rates of COVID-19 infection have been 2.6 times higher than the community rate in prison residents and 1.6 times higher in prison staff [3]. In the 34 facilities operated by the California Department of Corrections and Rehabilitation (CDCR), 50,575 resident cases and 15,259 staff cases were recorded as of October 9, 2021, and 240 residents and 46 staff died from COVID-19 in that time (staff mortality as of November 2021) [3]. Prisons and jails are an “epidemiological pump” [4] exporting cases to surrounding communities at accelerated rates [4–20]. Disease outbreaks are often especially large in correctional facilities due to bad conditions such as overcrowding [11, 12, 15, 16, 18, 19, 21–28], lack of ventilation and access to healthcare [11, 15, 18, 19, 22, 24, 26, 28, 29], and populations with elevated risk factors for severe disease [8, 9, 11, 14, 16, 18, 19, 22, 24, 26, 28].

In addition to expanding and continuing overall disease spread, correctional institutions amplify racial inequities in disease burden. The rate of incarceration is six times as high for Black people as for white people. Similarly, Latinx and indigenous people are incarcerated at a rate three times that of white people [30]. For this reason, outbreaks in prisons tend to amplify disparities in disease burden [31–41], with all its consequences including the mass disabling impacts of post-acute sequelae of COVID-19 (i.e. long COVID) [42–45], even without accounting for disparities among prison residents. Racial differences in incidence and/or mortality within correctional facilities may further exacerbate health disparity [46]. Additionally, counties with more Latinx and Indigenous people and lower average incomes are associated with higher infection rates in correctional facilities located

there [30], indicating another contribution of incarceration to racial disparities in disease burden and early death [47]. Overrepresentation of Black prison staff may mean that COVID exposure among staff also contributes to racial inequity in disease burden, as it does among residents [48].

Both the large size of correctional facility outbreaks and their frequency of occurrence contribute to their impact. Here we investigate the routes by which introductions of SARS-CoV-2 occur. Several outbreaks in prisons have likely been sparked via infected staff [49–53], and by transfers of infected residents between facilities [54–57]. For example, the San Quentin outbreak of June and July 2020, which led to 2241 cases and was caused by a transfer of infected residents from the Correctional Institute for Men (CIM) in Chino, California [58]. In many settings staff have been screened but not widely tested [59] Vaccination rates are low among corrections staff [60]. Prison staff have tended to report higher rates of COVID-19 than the surrounding community [48], though lower than among prison residents, suggesting that they may be a vector of transmission from prison to community.

Previous work [61] identified an effect of countywide COVID-19 case rates on prison cases. Research incorporating both staff and resident cases [62,63] found an association between community cases and staff cases, and between staff and resident cases, in US federal prisons, and recommended containment among staff to stem introductions of COVID-19 and other diseases into prisons. Reduction of prison populations by decarceration was found to decrease the risk of COVID-19 infection in federal prisons [63,64].

We use publicly available data to estimate the magnitude of flows to and from California state prisons, estimating rates of transmission from communities to prison staff and residents, among and between residents and staff within facilities, and between staff and residents of distinct facilities. Unlike prior studies, we use a mechanistic model, the Hawkes process, reflecting the dynamics of SARS-CoV-2 transmission for estimation and hypothesis testing.

## 2 Methods

### 2.1 Data

Case counts for prison residents and staff from April 1, 2020 to March 22, 2021 were obtained from the UCLA COVID Behind Bars project, which collected publicly available data from the California

Department of Corrections and Rehabilitation (CDCR). These data report a daily cumulative number of resident and staff cases at each of the 34 CDCR facilities. Cumulative case counts for each county were obtained from the California Health and Human Services Open Data Portal. A daily count of community cases in each California county was estimated by subtracting prison resident and staff cases in the county from the cumulative count of community cases. Isotonic regression was then used to estimate nondecreasing series of numbers of county, resident, and staff cases, and daily new cases were then calculated as the first difference of each of those series.

## 2.2 Statistical analysis

We modeled transmission between recorded cases using a Hawkes process model (see Appendix A for details). We used maximum likelihood estimation of the Hawkes process's parameters to estimate the rates of transmission between and within the resident and staff populations within the facilities and between distinct facilities, and from community to residents and staff of a prison in the prison's county and across the state.

The model included ten parameters describing intensity of transmission among prison resident, staff, and community populations, listed and described in Table 1. The ten unknown model parameters provide the constants of proportionality determining transmission rates between populations (see Appendix A for details).

The timing of transmission events was parametrized using a generation interval between infection of a case and transmission from that case, combined with a reporting interval from a case's date of infection to the day that case is listed in case count data. The generation time distribution used in these estimates was that estimated in a meta-analysis of COVID-19 generation times [65], a Weibull distribution with mean 5.5 days and standard deviation 1.8 days (parameters  $\alpha = 3.37$ ,  $\beta = 6.12$ ). The reporting interval was parametrized as a sum of a log-normal incubation period (mean 5.51 days, s.d. 2.4 days) and log-normal detection delay (mean 5 days, s.d. 2.8 days) as estimated by Xu *et al.* [66–68]. The contribution of a source case to creation of secondary cases on each day was assumed proportional to the probability density of the generation interval, plus the secondary case's reporting interval, minus the first case's reporting interval. The generation interval and second case's reporting interval conditional on infection date (*forward reporting interval*) have the above distributions, while the first case's reporting interval conditional on reporting date

(*backward reporting interval*) is estimated as follows, where  $p_r(\Delta t)$  is the probability mass function of the forward reporting interval and  $\hat{I}(t)$  is an estimate of the daily number of true infections [69]:

$$\hat{p}_r(\Delta t; t) = \frac{\hat{I}(t - \Delta t) p_r(\Delta t)}{\sum_{s \leq t} \hat{I}(s) p_r(t - s)}.$$

We estimated incidence from the reported case counts as  $\hat{I}(t) = X(t + \bar{r})$  where  $X(t)$  is reported case count on day  $t$  and  $\bar{r}$  is the nearest whole number to the mean forward reporting delay.

The model parameters were estimated by fitting the data using maximum likelihood estimation, using the log likelihood function defined in Appendix A. Confidence intervals for each parameter value were estimated using profile likelihood estimation [70].

We estimated the number and proportion of resident and staff cases attributed to each of the six different sources of infection modeled—from residents and staff in the same institution, from residents and staff in the CDCR system as a whole, and from community cases in the county containing the institution and across the state. Proportion of cases attributed to a source was estimated by the total intensity of transmission from the source relative to total intensity of transmission from all sources, where total intensity of transmission from a source is the *per capita* transmission rate estimated by the model fit scaled by the total number of cases recorded in the source population.

### 2.3 Transmission hypotheses

To evaluate the implications of the model fit, we constructed two nested models as special cases of the full model by constraining its parameters, detailed in Appendix A.5.

An “independent prisons” model, representing a hypothesis that transmission between prisons is not involved in outbreak dynamics, that is, that outbreaks in prisons originate in introductions from the surrounding communities, into either the resident or staff populations. This model is implemented by defining the between-prison transmission parameters of the full model to equal zero. The remaining parameters were fit using maximum likelihood estimation on the full model’s log likelihood function.

Second, a “well-mixed prisons” model represents a hypothesis that staff and residents do not have distinct roles in transmission, and can be treated as interchangeable in modeling. This is implemented by assuming the contact rates with all populations are equal for staff and for residents.

The remaining free parameters were fit using maximum likelihood estimation on the full model's log likelihood function.

We applied a likelihood ratio test to evaluate whether there were significant differences in the fit between the full model and either nested model, with three and six degrees of freedom, respectively. We estimated parameter confidence intervals using profile likelihood, and the number and proportion of resident and staff cases attributed to each source, for the two nested models as for the full model as described above.

## 2.4 Sensitivity analysis

Since true dates of infection are unknown and can only be approximated by dates of case detection, there is an inherent amount of uncertainty in the transmission dynamics of the cases recorded that can not be avoided. To examine the dependence of model results on assumptions about precision in detection of cases' timing, we fit the full model's parameters using a range of assumed reporting delay distributions, and the best fit results were plotted. The mean and standard deviation of the reporting delay distribution were varied independently by scaling and shifting its probability density function, and the effects of variation in the mean and standard deviation on the model estimate were reported separately.

## 2.5 Code and data availability

All data used in this study came from public sources. Source code and data files are available from the corresponding author by request.

# 3 Results

The data analyzed included 48,389 resident, 17,778 staff, and 2,492,711 community cases after removing prison cases from the California counties' counts. Outbreaks in California state prisons often coincided with surges of COVID-19 transmission in their surrounding communities (Figure 1), and outbreaks among residents often coincided with surges of cases among staff. The correlations among seven-day average case counts in a facility and its county were 0.42 between residents and staff, 0.24 between community and staff, and 0.14 between community and residents.

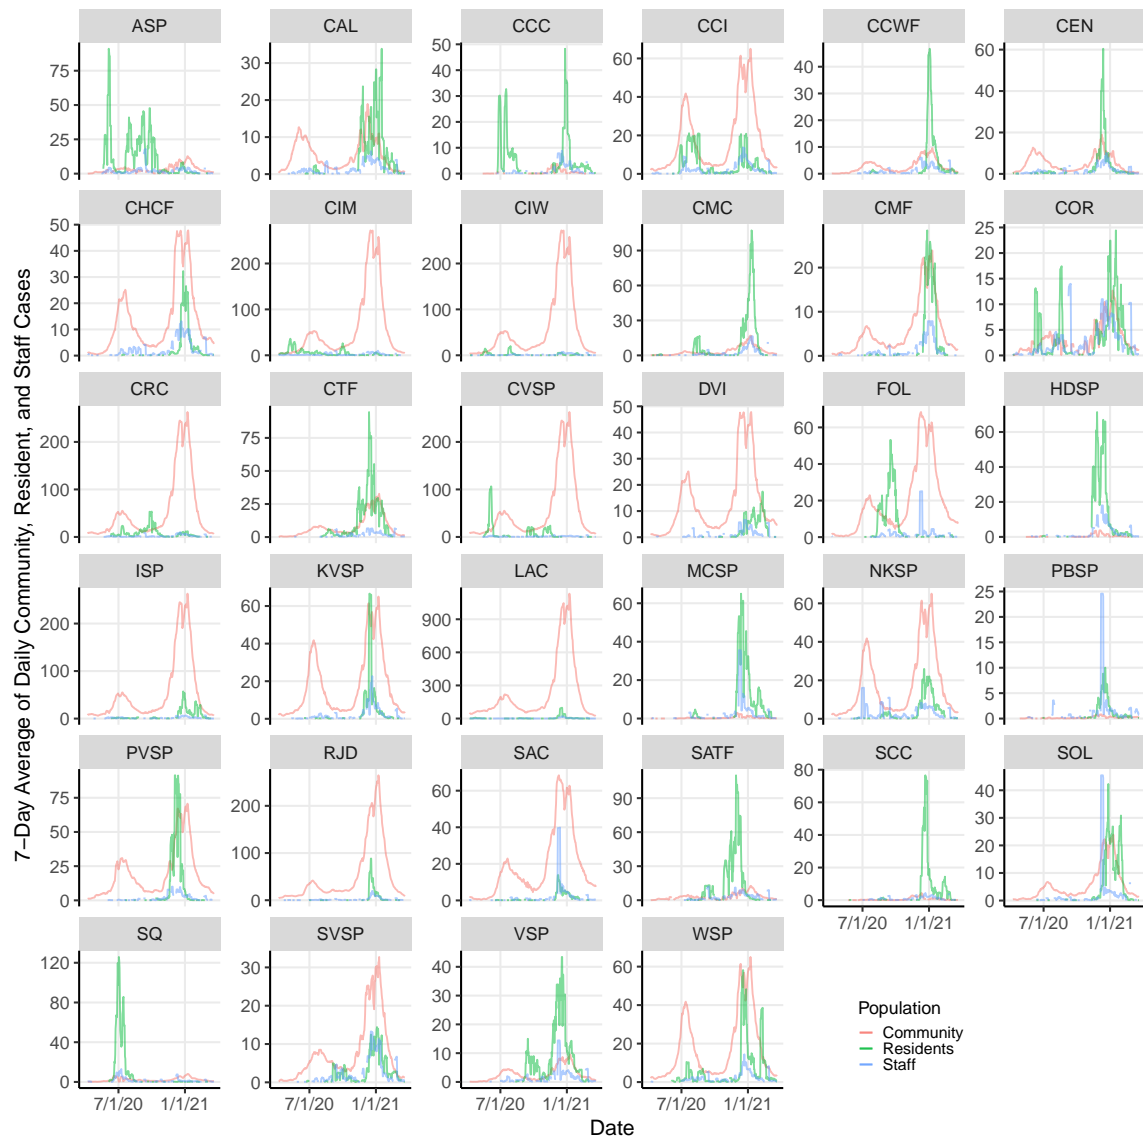

Figure 1: The 7-day average of daily community, resident, and staff cases in each prison and its county, between April 1, 2020 and March 22, 2021. The 7-day average of community cases does not include resident and staff cases in prisons and has been scaled by 1/100. See Table C.1 for abbreviations of facility names.

The full Hawkes process model estimated that transmission to residents was almost entirely from other residents within a facility, and transmission to staff was largely from staff at the same facility (Table 1, Figure 2, Figure 3, Figures B.1–B.6). Infective residents within the same facility are estimated to have contributed about 99.5% of the transmission to resident cases, and similarly staff at the same facility contributed about 92.9% of the transmission to staff. A smaller amount of transmission is estimated between staff across facilities, contributing about 3.1% of transmission to staff. Transmission between residents and staff within a facility is similarly comparatively rare, contributing about 0.4% of resident and 2.9% of staff cases. Contact with the local community contributes about 0.8% to staff cases. The result is similar under the independent prisons model, which assumes no transmission between facilities, and correspondingly attributes more staff cases to local community contacts, while under the well-mixed prisons model, which makes no distinction between staff and residents, transmission to each is primarily from local staff and residents, secondarily from other facilities, and thirdly from local communities.

Likelihood ratio testing found that the full model differed significantly from the independent prisons model ( $p < 0.01$ ), indicating that the rate of transmission between distinct CDCR facilities is significantly different from zero. The rate between staff at distinct facilities in particular has 95% confidence interval distinct from zero in the full model.

The full model also differed significantly from the well-mixed prisons model ( $p < 0.001$ ), indicating a difference between the sources for transmission to staff and to residents. This suggests that transmission from community to staff, and subsequently from staff to residents, is likely a contributor to prison COVID-19 cases.



Table 1: Description and estimated values of model parameters, with 95% confidence intervals.

| Parameter  | Definition                                                                                    | Full model fit                                                             | Model 1 fit                                                                | Model 2 fit                                                                |
|------------|-----------------------------------------------------------------------------------------------|----------------------------------------------------------------------------|----------------------------------------------------------------------------|----------------------------------------------------------------------------|
| $\beta_w$  | Intensity per case from residents to residents within a prison                                | 0.995<br>(0.987, 1.00)                                                     | 0.996<br>(0.987, 1.01)                                                     | 0.490<br>(0.486, 0.495)                                                    |
| $\beta_b$  | Intensity per case from residents to residents between prisons                                | $1.06 \times 10^{-5}$<br>(0.00, $9.20 \times 10^{-5}$ )                    | —                                                                          | 0.000279<br>(0.000260, 0.000290)                                           |
| $\gamma_w$ | Intensity per case from staff to residents and vice versa within a prison                     | 0.0106<br>(0.00726, 0.0139)                                                | 0.0106<br>(0.00718, 0.0140)                                                | —                                                                          |
| $\gamma_b$ | Intensity per case from staff at one prison to residents at a different prison and vice versa | $3.20 \times 10^{-5}$<br>(0.00, 0.000160)                                  | —                                                                          | —                                                                          |
| $\zeta_w$  | Intensity per case from staff to staff within a prison                                        | 0.932<br>(0.915, 0.953)                                                    | 0.954<br>(0.932, 0.975)                                                    | —                                                                          |
| $\zeta_b$  | Intensity per case from staff to staff between prisons                                        | 0.000935<br>(0.000416, 0.00145)                                            | —                                                                          | —                                                                          |
| $\psi_w$   | Intensity per case from community to residents in a prison in the same county                 | $3.73 \times 10^{-6}$<br>(0.00, $2.23 \times 10^{-5}$ )                    | $5.94 \times 10^{-6}$<br>(0.00, $2.59 \times 10^{-5}$ )                    | $1.44 \times 10^{-5}$<br>( $3.15 \times 10^{-7}$ , $2.38 \times 10^{-5}$ ) |
| $\psi_b$   | Intensity per case from community to residents in a prison in a different county              | 0.00<br>(0.00, $1.08 \times 10^{-6}$ )                                     | 0.00<br>(0.00, $1.46 \times 10^{-6}$ )                                     | 0.00<br>(0.00, $2.09 \times 10^{-7}$ )                                     |
| $\xi_w$    | Intensity per case from community to staff of a prison in the same county                     | $3.60 \times 10^{-5}$<br>( $5.62 \times 10^{-6}$ , $6.64 \times 10^{-5}$ ) | $4.93 \times 10^{-5}$<br>( $1.92 \times 10^{-5}$ , $8.19 \times 10^{-5}$ ) | —                                                                          |
| $\xi_b$    | Intensity per case from community to staff of a prison in a different county                  | 0.00<br>(0.00, $1.43 \times 10^{-6}$ )                                     | $1.98 \times 10^{-6}$<br>(0.00, $5.23 \times 10^{-6}$ )                    | —                                                                          |

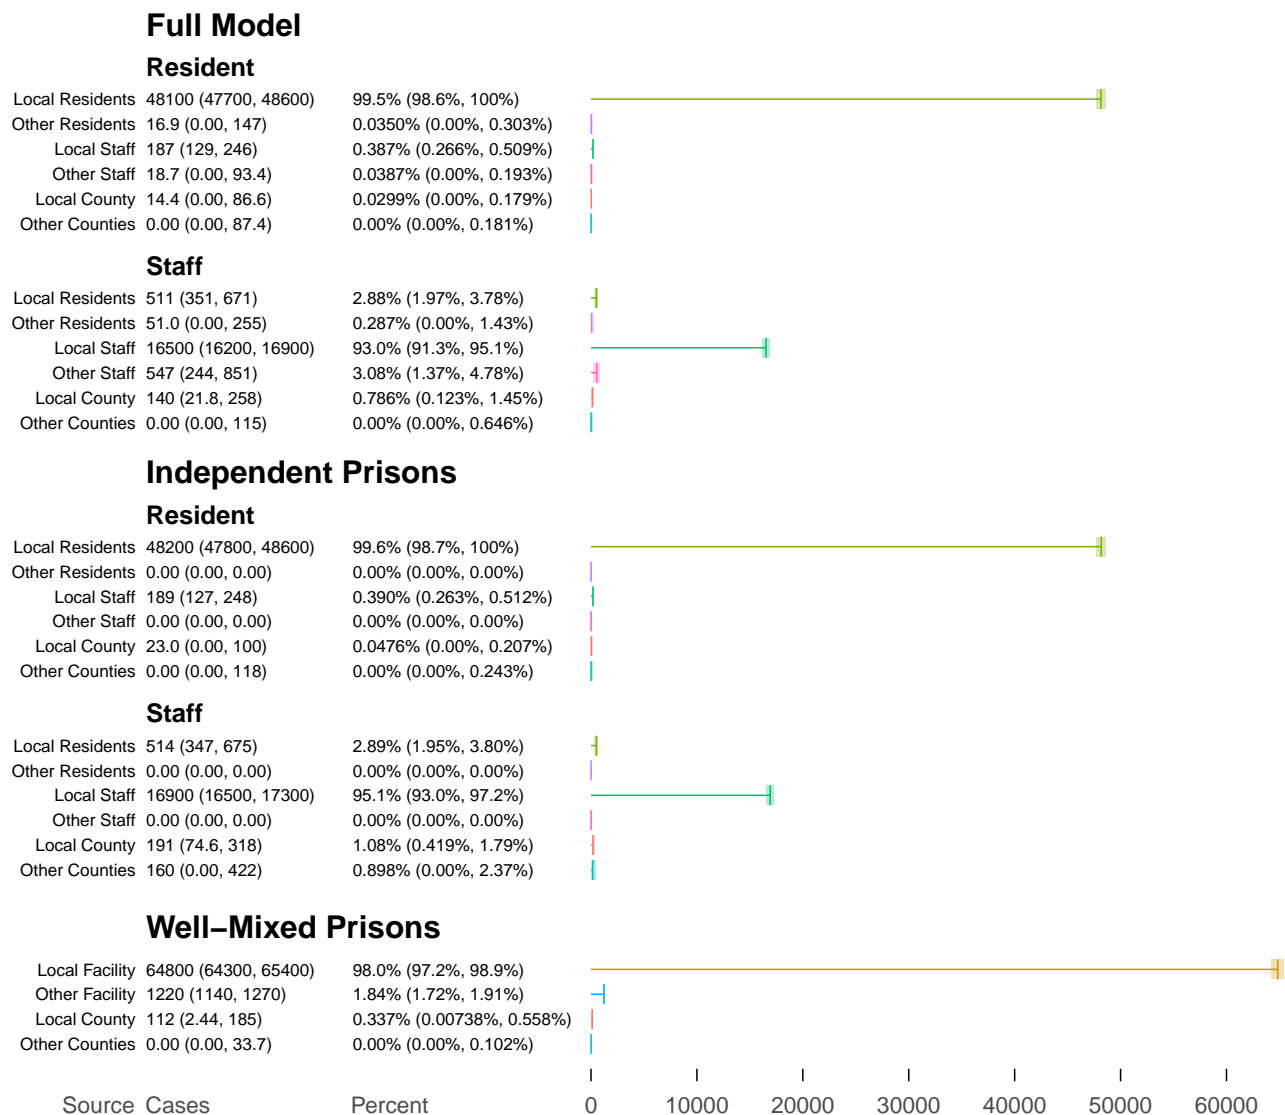

Figure 2: Estimated absolute and percent contributions of sources to transmission to residents and staff cases.

### 3.1 Sensitivity analysis

We examined how the maximum-likelihood estimate of the full model's parameters was affected by assumptions about timing of cases' detection, by varying the mean and standard deviation of the reporting delay distribution. The model results are found to be insensitive to variation in the mean delay. We found that the standard deviation of the reporting delay, indicating the amount of uncertainty in timing of infections, has a quantitative impact on the model results, but not a qualitative one in the range of values examined (Figure 4).

## 4 Discussion

Our results indicate that prison staff unsurprisingly have more outside contact events than prison residents, both with the surrounding community and with other facilities. The latter may involve staff who travel between facilities [52, 53]: CDCR data shows staff members work at an average of two facilities [3]. This supports the idea that staff may be an important source of transmission into and out of prisons. Testing of staff may be inadequate to prevent spread into prisons [59], and the problem may be exacerbated by low staff vaccination levels [60].

Both testing and vaccination are important occupational health measures for correctional staff as well as for outbreak prevention [71, 72]. Transmission due to transfer of infected residents is not clearly distinguished from zero by this model, perhaps due to relative rarity compared to everyday transmission. Nonetheless, it is known to have caused major outbreaks in the CDCR system, and must be taken very seriously as a source of risk.

Prevention of prison outbreaks is crucial, not only for protection of residents and staff, but to reduce overall transmission and exacerbation of unjust disparities in disease burden [8, 11, 13, 15, 24, 33, 73–77]. Decarceration continues to be urgently needed [6, 8, 11, 12, 14, 15, 18, 19, 21, 23, 24, 26, 30, 33, 61, 74, 76, 78–97].

This study has a number of limitations. The use of a stationary Hawkes process formulation does not account for temporal variation in transmission rates, whether due to depletion of susceptible individuals or other causes. While we use it here to look at the relative contributions to the transmission rate, which may be relatively insensitive to that approximation, it may introduce inaccuracy. The time period studied may not be predictive of dynamics after March 2021. Differ-

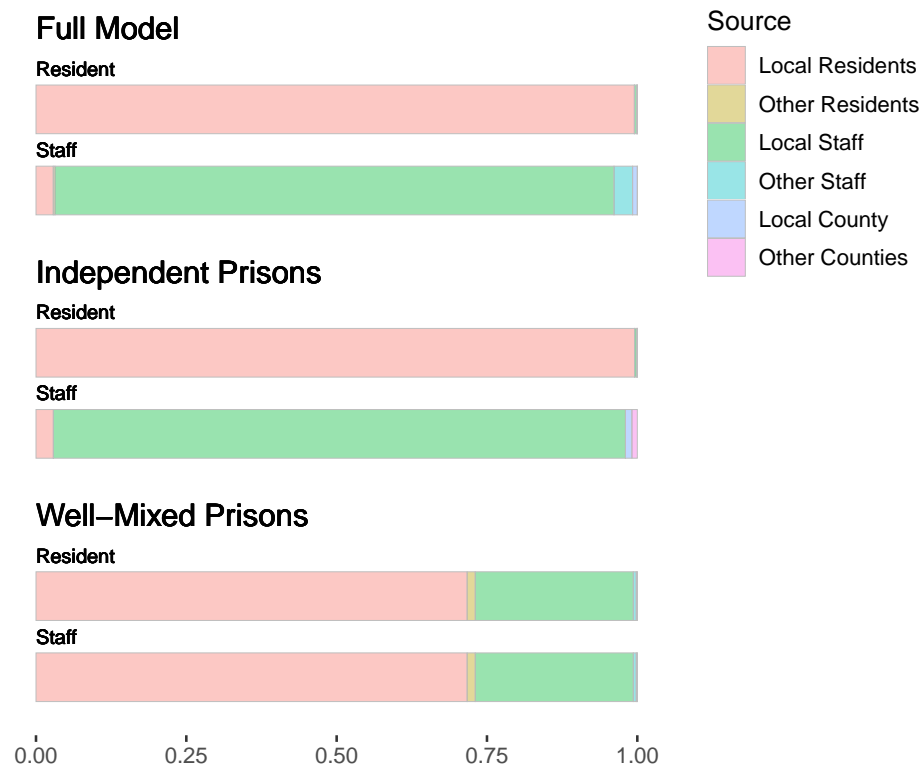

Figure 3: Estimated proportion of resident and staff cases attributed to each source of infection, under the full Hawkes process model and the two nested Hawkes process models.

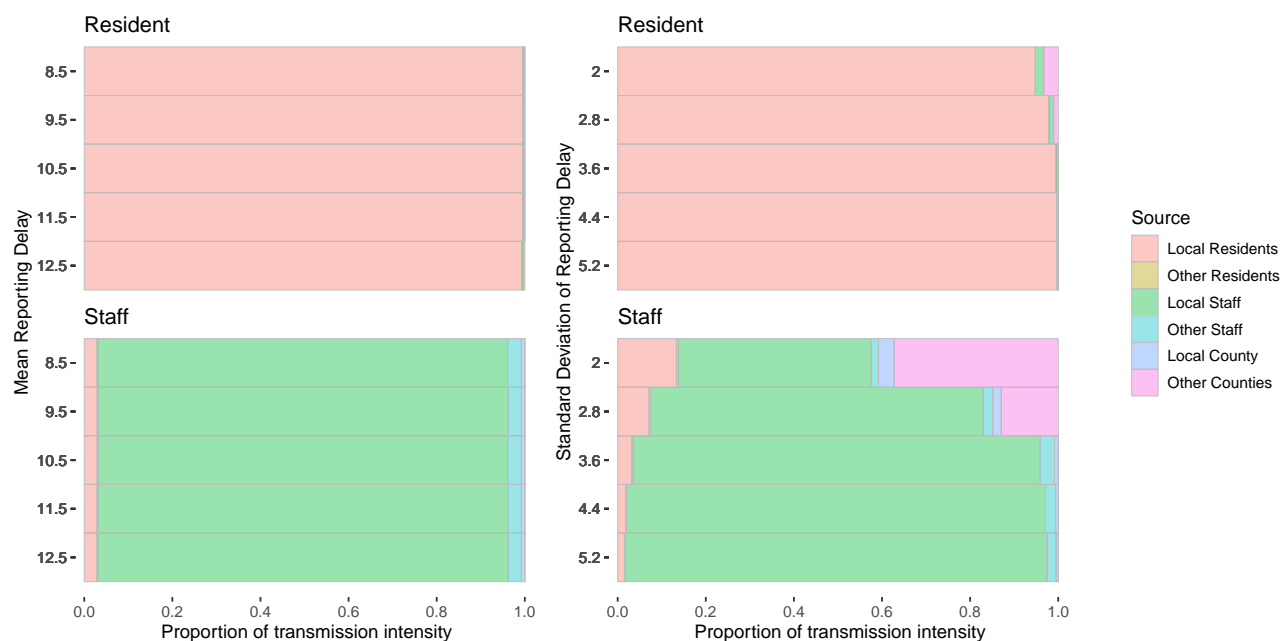

Figure 4: Dependence of full model result on mean (left) and standard deviation (right) of assumed case reporting delay. Tinted bars denote fraction of infection intensity affecting residents and staff due to each source of infection.

ences between the 34 CDCR facilities may be obscured by this model. Dynamics such as rare but influential transfers of infected individuals may not be identifiable from the data set used. Variable case detection could introduce bias; for example, if testing is more frequent during outbreaks in facilities, the proportion of cases originating in the facilities could be overestimated. The assumption of symmetric transmission rates between staff and residents may be a limitation, as for example one or the other population may be more likely to be isolated while infective.

We find the Hawkes process formulation to be a powerful and flexible technique for estimation of transmission rates between segments of a population. Mechanistic knowledge of the process such as a generation time distribution can be used directly to infer mixing rates from data without extensive intermediary steps such as simulation. It can be used to estimate mixing rates in a broad variety of structured-population disease transmission problems, and it may prove useful in a wide range of disease modeling applications in the future.

## 4.1 Acknowledgements

PD, TCP, and LW were supported by NIH GM130900. SB, CMH, PL, and TCP were supported by CDC U01CK000590, as part of the Modeling Infectious Diseases in Healthcare Network. SB was also supported by NIH K12 EY031372. LW received partial funding from the Office of the Federal Receiver, which oversees the delivery of healthcare services in California's state prison system, for research not including this project. The funders had no role in study design, data collection and analysis, decision to publish, or preparation of the manuscript.

## References

- [1] Jordan Allen, Sarah Almukhtar, Aliza Aufrichtig, Anne Barnard, Matthew Bloch, Penn Bullock, Sarah Cahalan, Weiyi Cai, Julia Calderone, Keith Collins, Matthew Conlen, Lindsey Cook, Gabriel Gianordoli, Amy Harmon, Rich Harris, Adeel Hassan, Jon Huang, Danya Issawi, Danielle Ivory, K.K. Rebecca Lai, Alex Lemonides, Eleanor Lutz, Allison McCann, Richard A. Oppel Jr., Jugal K. Patel, Alison Saldanha, Kirk Semple, Shelly Seroussi, Julie Walton Shaver, Amy Schoenfeld Walker, Anjali Singhvi, Charlie Smart, Mitch Smith, Albert Sun, Rumsey Taylor, Lisa Waananen Jones, Derek Watkins, Timothy Williams, Jin Wu, and Karen Yourish. Early Coronavirus Cases in Nursing Homes, Prisons and Other Locations. *The New York Times*, January 2022.
- [2] California Department of Corrections. Population COVID-19 Tracking.
- [3] California State Prisons During the COVID-19 Pandemic: A Report by the CalPROTECT Project, 2022.
- [4] Eric Reinhart and Daniel L. Chen. Carceral-community epidemiology, structural racism, and COVID-19 disparities. *Proceedings of the National Academy of Sciences*, 118(21):e2026577118, May 2021. Publisher: Proceedings of the National Academy of Sciences.

- [5] Eric Reinhart and Daniel L. Chen. Incarceration And Its Disseminations: COVID-19 Pandemic Lessons From Chicago’s Cook County Jail. *Health Affairs*, 39(8):1412–1418, August 2020. Publisher: Health Affairs.
- [6] Eric Reinhart and Daniel L. Chen. Association of Jail Decarceration and Anticontagion Policies With COVID-19 Case Growth Rates in US Counties. *JAMA network open*, 4(9):e2123405, September 2021.
- [7] Kaitlyn M. Sims, Jeremy Foltz, and Marin Elisabeth Skidmore. Prisons and COVID-19 Spread in the United States. *American Journal of Public Health*, 111(8):1534–1541, August 2021. Publisher: American Public Health Association.
- [8] Leslie Jones and Olivia Tulloch. COVID-19: Why Are Prisons a Particular Risk, and What Can Be Done to Mitigate this? May 2020. Accepted: 2020-05-07T08:24:25Z Publisher: SSHAP.
- [9] Frédéric Dutheil, Jean-Baptiste Bouillon-Minois, and Maëlys Clinchamps. COVID-19: a prison-breaker? *Canadian Journal of Public Health*, 111(4):480–481, August 2020.
- [10] Stuart A. Kinner, Jesse T. Young, Kathryn Snow, Louise Southalan, Daniel Lopez-Acuña, Carina Ferreira-Borges, and Éamonn O’Moore. Prisons and custodial settings are part of a comprehensive response to COVID-19. *The Lancet Public Health*, 5(4):e188–e189, April 2020. Publisher: Elsevier.
- [11] Brandy F. Henry. Social Distancing and Incarceration: Policy and Management Strategies to Reduce COVID-19 Transmission and Promote Health Equity Through Decarceration. *Health Education & Behavior*, 47(4):536–539, August 2020. Publisher: SAGE Publications Inc.
- [12] Paul L. Simpson and Tony G. Butler. Covid-19, prison crowding, and release policies. *BMJ*, 369:m1551, April 2020. Publisher: British Medical Journal Publishing Group Section: Editorial.
- [13] Regional Office for Europe World Health Organization. Preparedness, prevention and control of COVID-19 in prisons and other places of detention (2020), Interim guidance 15 March 2020. March 2020. Accepted: 2020-03-25T01:06:38Z.

- [14] Dora M. Dumont, Brad Brockmann, Samuel Dickman, Nicole Alexander, and Josiah D. Rich. Public Health and the Epidemic of Incarceration. *Annual Review of Public Health*, 33(1):325–339, 2012. eprint: <https://doi.org/10.1146/annurev-publhealth-031811-124614>.
- [15] Andre G. Montoya-Barthelemy, Charles D. Lee, Dave R. Cundiff, and Eric B. Smith. COVID-19 and the Correctional Environment: The American Prison as a Focal Point for Public Health. *American Journal of Preventive Medicine*, 58(6):888–891, June 2020. Publisher: Elsevier.
- [16] Liesl M. Hagan. Mass Testing for SARS-CoV-2 in 16 Prisons and Jails — Six Jurisdictions, United States, April–May 2020. *MMWR. Morbidity and Mortality Weekly Report*, 69, 2020.
- [17] Scott Greenhalgh and Ashley Provencher. Inclusive health: modeling COVID-19 in correctional facilities and communities. *BMC Public Health*, 22(1):982, May 2022.
- [18] Ada Kwan, Rachel Sklar, Drew B. Cameron, Robert C. Schell, Stefano M. Bertozzi, Sandra I. McCoy, Brie Williams, and David A. Sears. Respiratory pandemic preparedness learnings from the June 2020 COVID-19 outbreak at San Quentin California State Prison. *International Journal of Prisoner Health*, ahead-of-print(ahead-of-print), June 2022.
- [19] Elizabeth Barnert, Ada Kwan, and Brie Williams. Ten Urgent Priorities Based on Lessons Learned From More Than a Half Million Known COVID-19 Cases in US Prisons. *American Journal of Public Health*, 111(6):1099–1105, June 2021. Publisher: American Public Health Association.
- [20] Christopher Weyant, Serin Lee, Jason R. Andrews, Fernando Alarid-Escudero, and Jeremy D. Goldhaber-Fiebert. Dynamics of Respiratory Infectious Diseases in Incarcerated and Free-Living Populations: A Simulation Modeling Study. *Medical Decision Making: An International Journal of the Society for Medical Decision Making*, 43(1):42–52, January 2023.
- [21] Noel Vest, Oshea Johnson, Kathryn Nowotny, and Lauren Brinkley-Rubinstein. Prison Population Reductions and COVID-19: A Latent Profile Analysis Synthesizing Recent Evidence From the Texas State Prison System. *Journal of Urban Health*, 98(1):53–58, February 2021.



- [22] Brendan Saloner, Kalind Parish, Julie A. Ward, Grace DiLaura, and Sharon Dolovich. COVID-19 Cases and Deaths in Federal and State Prisons. *JAMA*, 324(6):602–603, August 2020.
- [23] Abigail I. Leibowitz, Mark J. Siedner, Alexander C. Tsai, and Amir M. Mohareb. Association Between Prison Crowding and COVID-19 Incidence Rates in Massachusetts Prisons, April 2020-January 2021. *JAMA Internal Medicine*, 181(10):1315–1321, October 2021.
- [24] Talha Burki. Prisons are “in no way equipped” to deal with COVID-19. *The Lancet*, 395(10234):1411–1412, May 2020. Publisher: Elsevier.
- [25] Mariano Cingolani, Lina Caraceni, Nunzia Cannovo, and Piergiorgio Fedeli. The COVID-19 Epidemic and the Prison System in Italy. *Journal of Correctional Health Care*, March 2021. Publisher: Mary Ann Liebert, Inc., publishers 140 Huguenot Street, 3rd Floor New Rochelle, NY 10801 USA.
- [26] S McCoy, SM Bertozzi, D Sears, A Kwan, C Duarte, D Cameron, and B Williams. Urgent memo: COVID-19 outbreak: San Quentin prison. *San Francisco, CA*, 2020.
- [27] Byron S. Kennedy, Robert P. Richeson, and Amy J. Houde. Risk Factors for SARS-CoV-2 in a Statewide Correctional System. *New England Journal of Medicine*, 383(25):2479–2480, December 2020. Publisher: Massachusetts Medical Society.
- [28] James Byrne, Sabrina S. Rapisarda, Don Hummer, and Kimberly R. Kras. An Imperfect Storm: Identifying the Root Causes of COVID-19 Outbreaks in the World’s Largest Corrections Systems. *Victims & Offenders*, 15(7-8):862–909, October 2020. Publisher: Routledge  
\_eprint: <https://doi.org/10.1080/15564886.2020.1838373>.
- [29] Yiran E. Liu, Christopher LeBoa, Marcela Rodriguez, Beruk Sherif, Chrisele Trinidad, Michael Del Rosario, Sophie Allen, Christine Clifford, Jennifer Redding, Wei-Ting Chen, Lisa G. Rosas, Carlos Morales, Alexander Chyorny, and Jason R. Andrews. COVID-19 Preventive Measures in Northern California Jails: Perceived Deficiencies, Barriers, and Unintended Harms. *Frontiers in Public Health*, 10:854343, 2022.

- [30] Traci Schlesinger. Mass Incarceration, COVID-19, and Race as Exposure to Early Death. *Vincentian Heritage Journal*, 36(2), January 2022.
- [31] Kathryn M. Nowotny, Zinzi Bailey, and Lauren Brinkley-Rubinstein. The Contribution of Prisons and Jails to US Racial Disparities During COVID-19. *American Journal of Public Health*, 111(2):197–199, February 2021. Publisher: American Public Health Association.
- [32] Dora M. Dumont, Scott A. Allen, Bradley W. Brockmann, Nicole E. Alexander, and Josiah D. Rich. Incarceration, Community Health, and Racial Disparities. *Journal of Health Care for the Poor and Underserved*, 24(1):78–88, 2013. Publisher: Johns Hopkins University Press.
- [33] Matthew J. Akiyama, Anne C. Spaulding, and Josiah D. Rich. Flattening the Curve for Incarcerated Populations — Covid-19 in Jails and Prisons. *New England Journal of Medicine*, 382(22):2075–2077, May 2020. Publisher: Massachusetts Medical Society.
- [34] Cato T. Laurencin and Aneesah McClinton. The COVID-19 Pandemic: a Call to Action to Identify and Address Racial and Ethnic Disparities. *Journal of Racial and Ethnic Health Disparities*, 7(3):398–402, June 2020.
- [35] Samrachana Adhikari, Nicholas P. Pantaleo, Justin M. Feldman, Olugbenga Ogedegbe, Lorna Thorpe, and Andrea B. Troxel. Assessment of Community-Level Disparities in Coronavirus Disease 2019 (COVID-19) Infections and Deaths in Large US Metropolitan Areas. *JAMA Network Open*, 3(7):e2016938, July 2020.
- [36] Cary P. Gross, Utibe R. Essien, Saamir Pasha, Jacob R. Gross, Shi-yi Wang, and Marcella Nunez-Smith. Racial and Ethnic Disparities in Population Level Covid-19 Mortality, May 2020. Pages: 2020.05.07.20094250.
- [37] Rishi K. Wadhera, Priya Wadhera, Prakriti Gaba, Jose F. Figueroa, Karen E. Joynt Maddox, Robert W. Yeh, and Changyu Shen. Variation in COVID-19 Hospitalizations and Deaths Across New York City Boroughs. *JAMA*, 323(21):2192–2195, June 2020.
- [38] Lonnie R. Snowden and Genevieve Graaf. COVID-19, Social Determinants Past, Present, and Future, and African Americans’ Health. *Journal of Racial and Ethnic Health Disparities*, 8(1):12–20, February 2021.

- [39] Lauren Jeanne Natoli, Kathy Linh Vu, Adam Carl Sukhija-Cohen, Whitney Engeran-Cordova, Gabriel Maldonado, Scott Galvin, William Arroyo, and Cynthia Davis. Incarceration and COVID-19: Recommendations to Curb COVID-19 Disease Transmission in Prison Facilities and Surrounding Communities. *International Journal of Environmental Research and Public Health*, 18(18):9790, January 2021. Number: 18 Publisher: Multidisciplinary Digital Publishing Institute.
- [40] Whitney N. Laster Pirtle. Racial Capitalism: A Fundamental Cause of Novel Coronavirus (COVID-19) Pandemic Inequities in the United States. *Health Education & Behavior*, 47(4):504–508, August 2020. Publisher: SAGE Publications Inc.
- [41] Kathryn Nowotny, Hannah Metheny, Katherine LeMasters, and Lauren Brinkley-Rubinstein. Age and COVID-19 mortality in the United States: a comparison of the prison and general population. *International Journal of Prisoner Health*, ahead-of-print(ahead-of-print), June 2022.
- [42] Hannah E. Davis, Lisa McCorkell, Julia Moore Vogel, and Eric J. Topol. Long COVID: major findings, mechanisms and recommendations. *Nature Reviews Microbiology*, 21(3):133–146, March 2023. Number: 3 Publisher: Nature Publishing Group.
- [43] Alice Uwase Bayingana, Agnes Binagwaho, and Kedest Mathewos. What will we choose to learn from the COVID-19 pandemic? *BMJ Global Health*, 6(8):e007005, August 2021.
- [44] Bryan Lau, Eryka Wentz, Zhanmo Ni, Karine Yenokyan, Candelaria Coggiano, Shruti H. Mehta, and Priya Duggal. Physical and mental health disability associated with long-COVID: Baseline results from a US nationwide cohort, December 2022. Pages: 2022.12.07.22283203.
- [45] Arianna Maeve Loreche, Vincent Christian F. Pepito, and Manuel M. Dayrit. Long Covid: A call for global action. *Public Health Challenges*, 2(1):e69, 2023. eprint: <https://onlinelibrary.wiley.com/doi/pdf/10.1002/puh2.69>.
- [46] Neal Marquez, Destiny Moreno, Amanda Klonsky, and Sharon Dolovich. Racial And Ethnic Inequalities In COVID-19 Mortality Within Carceral Settings: An Analysis Of Texas Prisons. *Health Affairs*, 41(11):1626–1634, November 2022. Publisher: Health Affairs.

- [47] Ruth Wilson Gilmore. *Golden Gulag: Prisons, Surplus, Crisis, and Opposition in Globalizing California*. University of California Press, 2007. Google-Books-ID: 96YwDwAAQBAJ.
- [48] Kathryn M. Nowotny, Kapriske Seide, and Lauren Brinkley-Rubinstein. Risk of COVID-19 infection among prison staff in the United States. *BMC Public Health*, 21(1):1036, June 2021.
- [49] Ruggero Giuliani, Cristina Cairone, Lara Tavoschi, Laura Ciaffi, Teresa Sebastiani, Raffaella Bartolotti, Silvia Mancini, Laura Cremonini, and Roberto Ranieri. COVID-19 outbreak investigation and response in a penitentiary setting: the experience of a prison in Italy, February to April 2020. *Eurosurveillance*, 26(38):2001385, September 2021. Publisher: European Centre for Disease Prevention and Control.
- [50] James P. Adamson, Christopher Smith, Nicole Pacchiarini, Thomas Richard Connor, Janet Wallsgrove, Ian Coles, Clare Frost, Angharad Edwards, Jaisi Sinha, Catherine Moore, Steph Perrett, Christie Craddock, Clare Sawyer, Alison Waldram, Alicia Barrasa, Daniel Rh Thomas, Philip Daniels, and Heather Lewis. A large outbreak of COVID-19 in a UK prison, October 2020 to April 2021. *Epidemiology & Infection*, 150:e134, 2022. Publisher: Cambridge University Press.
- [51] Henri Christian Junior Tsoungui Obama, Nessma Adil Mahmoud Yousif, Looli Alawam Nemer, Pierre Marie Ngougoue Ngougoue, Gideon Akumah Ngwa, Miranda Teboh-Ewungkem, and Kristan Alexander Schneider. Preventing COVID-19 spread in closed facilities by regular testing of employees—An efficient intervention in long-term care facilities and prisons? *PLOS ONE*, 16(4):e0249588, April 2021. Publisher: Public Library of Science.
- [52] Kathryn M. Nowotny, David Cloud, Alysse G. Wurcel, and Lauren Brinkley-Rubinstein. Disparities in covid-19 related mortality in US prisons and the general population. *medRxiv*, 2020.
- [53] Elizabeth Barnert, Cyrus Ahalt, and Brie Williams. Prisons: amplifiers of the covid-19 pandemic hiding in plain sight. *American Journal of Public Health*, 110:964–966, 2020.
- [54] Catherine Duarte, Drew B. Cameron, Ada T. Kwan, Stefano M. Bertozzi, Brie A. Williams, and Sandra I. McCoy. COVID-19 outbreak in a state prison: a case study on the implemen-

- tation of key public health recommendations for containment and prevention. *BMC public health*, 22(1):977, May 2022.
- [55] Rebecca B. Hershov, Hannah E. Segaloff, Abigail C. Shockey, Kelsey R. Florek, Sabrina K. Murphy, Weston DuBose, Tammy L. Schaeffer, Jo Anna Powell Mph, Krystal Gayle, Lauren Lambert, Ameer Schwitters, Kristie E. N. Clarke, and Ryan Westergaard. Rapid Spread of SARS-CoV-2 in a State Prison After Introduction by Newly Transferred Incarcerated Persons - Wisconsin, August 14-October 22, 2020. *MMWR. Morbidity and mortality weekly report*, 70(13):478–482, April 2021.
- [56] Lauren Brinkley-Rubinstein, Katherine LeMasters, Phuc Nguyen, Kathryn Nowotny, David Cloud, and Alexander Volfovsky. The association between intersystem prison transfers and COVID-19 incidence in a state prison system. *PloS One*, 16(8):e0256185, 2021.
- [57] Todd L. Parsons and Lee Worden. Assessing the risk of cascading COVID-19 outbreaks from prison-to-prison transfers. *Epidemics*, 37:100532, December 2021.
- [58] Office of the Inspector General. COVID-19 Review Series, Part Three: California Correctional Health Care Services and the California Department of Corrections and Rehabilitation caused a public health disaster at San Quentin state prison when they transferred medically vulnerable incarcerated persons from the California Institution for Men without taking proper safeguards, 2021. <https://www.oig.ca.gov/wp-content/uploads/2021/02/OIG-COVID-19-Review-Series-Part-3-Transfer-of-Patients-from-CIM.pdf>, accessed 2021.
- [59] Megan Wallace. COVID-19 in Correctional and Detention Facilities — United States, February–April 2020. *MMWR. Morbidity and Mortality Weekly Report*, 69, 2020.
- [60] Lea Prince, Elizabeth Long, David M. Studdert, David Leidner, Elizabeth T. Chin, Jason R. Andrews, Joshua A. Salomon, and Jeremy D. Goldhaber-Fiebert. Uptake of COVID-19 Vaccination Among Frontline Workers in California State Prisons. *JAMA Health Forum*, 3(3):e220099, March 2022.

- [61] Katherine LeMasters, Shabbar Ranapurwala, Morgan Maner, Kathryn M. Nowotny, Meghan Peterson, and Lauren Brinkley-Rubinstein. COVID-19 community spread and consequences for prison case rates. *PLOS ONE*, 17(4):e0266772, April 2022. Publisher: Public Library of Science.
- [62] Danielle Wallace, John M. Eason, Jason Walker, Sherry Towers, Tony H. Grubestic, and Jake R. Nelson. Is There a Temporal Relationship between COVID-19 Infections among Prison Staff, Incarcerated Persons and the Larger Community in the United States? *International Journal of Environmental Research and Public Health*, 18(13):6873, January 2021. Number: 13 Publisher: Multidisciplinary Digital Publishing Institute.
- [63] Sherry Towers, Danielle Wallace, Jason Walker, John M. Eason, Jake R. Nelson, and Tony H. Grubestic. A study of SARS-COV-2 outbreaks in US federal prisons: the linkage between staff, incarcerated populations, and community transmission. *BMC Public Health*, 22(1):482, March 2022.
- [64] Seth Blumberg, Phoebe Lu, Ada T. Kwan, Christopher M. Hoover, James O. Lloyd-Smith, David Sears, Stefano M. Bertozzi, and Lee Worden. Modeling scenarios for mitigating outbreaks in congregate settings. *PLOS Computational Biology*, 18(7):e1010308, July 2022. Publisher: Public Library of Science.
- [65] Luca Ferretti, Alice Ledda, Chris Wymant, Lele Zhao, Virginia Ledda, Lucie Abeler-Dörner, Michelle Kendall, Anel Nurtay, Hao-Yuan Cheng, Ta-Chou Ng, Hsien-Ho Lin, Rob Hinch, Joanna Masel, A. Marm Kilpatrick, and Christophe Fraser. The Timing of COVID-19 Transmission. SSRN Scholarly Paper ID 3716879, Social Science Research Network, Rochester, NY, October 2020.
- [66] Ran Xu, Hazhir Rahmandad, Marichi Gupta, Catherine DiGennaro, Navid Ghaffarzadegan, Heresh Amini, and Mohammad S. Jalali. The Modest Impact of Weather and Air Pollution on COVID-19 Transmission, May 2020. Pages: 2020.05.05.20092627.
- [67] Stephen A. Lauer, Kyra H. Grantz, Qifang Bi, Forrest K. Jones, Qulu Zheng, Hannah R. Meredith, Andrew S. Azman, Nicholas G. Reich, and Justin Lessler. The Incubation Period of

- Coronavirus Disease 2019 (COVID-19) From Publicly Reported Confirmed Cases: Estimation and Application. *Annals of Internal Medicine*, March 2020.
- [68] Natalie M Linton, Tetsuro Kobayashi, Yichi Yang, Katsuma Hayashi, Andrei R Akhmetzhanov, Sung-mok Jung, Baoyin Yuan, Ryo Kinoshita, and Hiroshi Nishiura. Incubation period and other epidemiological characteristics of 2019 novel coronavirus infections with right truncation: a statistical analysis of publicly available case data. *Journal of clinical medicine*, 9(2):538, 2020. Publisher: MDPI.
- [69] Sang Woo Park, Kaiyuan Sun, David Champredon, Michael Li, Benjamin M. Bolker, David J. D. Earn, Joshua S. Weitz, Bryan T. Grenfell, and Jonathan Dushoff. Forward-looking serial intervals correctly link epidemic growth to reproduction numbers. *Proceedings of the National Academy of Sciences*, 118(2):e2011548118, January 2021.
- [70] Benjamin M. Bolker. *Ecological Models and Data in R*. Princeton University Press, July 2008. Google-Books-ID: flyBd1rpqeoC.
- [71] David Sears, Cyrus Ahalt, Dallas Augustine, and Brie Williams. Occupational Health: A Key to the Control of COVID-19 in Correctional Facilities. *Annals of Internal Medicine*, 173(11):924–925, December 2020. Publisher: American College of Physicians.
- [72] Christopher M. Hoover, Nicholas K. Skaff, Seth Blumberg, and Rena Fukunaga. Aligning staff schedules, testing, and isolation reduces the risk of COVID-19 outbreaks in carceral and other congregate settings: A simulation study. *PLOS Global Public Health*, 3(1):e0001302, January 2023. Publisher: Public Library of Science.
- [73] Des Crowley, Walter Cullen, Patrick O’Donnell, and Marie Claire Van Hout. Prison and opportunities for the management of COVID-19. *BJGP Open*, 4(3), August 2020. Publisher: Royal College of General Practitioners Section: Practice & Policy.
- [74] Emily Widra. Failing Grades: States’ Responses to COVID-19 in Jails & Prisons. 2020.
- [75] Robin L. Toblin, Sylvie I. Cohen, and Liesl M. Hagan. SARS-CoV-2 Infection Among Correctional Staff in the Federal Bureau of Prisons. *American Journal of Public Health*, 111(6):1164–1167, June 2021. Publisher: American Public Health Association.

- [76] Eric T. Lofgren, Kristian Lum, Aaron Horowitz, Brooke Mabubuonwu, Kellen Meyers, and Nina H. Fefferman. Carceral Amplification of COVID-19: Impacts for Community, Corrections Officer, and Incarcerated Population Risks. *Epidemiology*, 33(4):480, July 2022.
- [77] Kate Kelly, Nai Soto, Nadi Damond Wisseh, and Shaina A. Clerget. Approaches to Reducing Risk of COVID-19 Infections in Prisons and Immigration Detention Centers: A Commentary. *Criminal Justice Review*, page 0734016820957707, September 2020. Publisher: SAGE Publications Inc.
- [78] Kathryn Nowotny, Zinzi Bailey, Marisa Omori, and Lauren Brinkley-Rubinstein. COVID-19 Exposes Need for Progressive Criminal Justice Reform. *American Journal of Public Health*, 110(7):967–968, July 2020. Publisher: American Public Health Association.
- [79] Brenda Vose, Francis T. Cullen, and Heejin Lee. Targeted Release in the COVID-19 Correctional Crisis: Using the RNR Model to Save Lives. *American Journal of Criminal Justice*, 45(4):769–779, August 2020.
- [80] Shadd Maruna, Gillian McNaull, and Nina O’Neill. The COVID-19 Pandemic and the Future of the Prison. *Crime and Justice*, 51:59–103, January 2022. Publisher: The University of Chicago Press.
- [81] Giovanni S. P. Malloy, Lisa Puglisi, Margaret L. Brandeau, Tyler D. Harvey, and Emily A. Wang. Effectiveness of interventions to reduce COVID-19 transmission in a large urban jail: a model-based analysis. *BMJ Open*, 11(2):e042898, February 2021. Publisher: British Medical Journal Publishing Group Section: Health policy.
- [82] APHA. Advancing Public Health Interventions to Address the Harms of the Carceral System.
- [83] Elizabeth Barnert, Cyrus Ahalt, and Brie Williams. Prisons: Amplifiers of the COVID-19 Pandemic Hiding in Plain Sight. *American Journal of Public Health*, 110(7):964–966, July 2020. Publisher: American Public Health Association.
- [84] Emily A Wang, Bruce Western, Emily P Backes, and Julie Schuck. DECARCERATING CORRECTIONAL FACILITIES DURING COVID 19. *Decarcerating Correctional Facilities during COVID-19*, pages 1–146, 2021.



- [85] Mass Incarceration, Meet COVID-19, November 2020.
- [86] Brie A. Williams, Cyrus Ahalt, David Cloud, Dallas Augustine, Leah Rorvig, and David Sears. Correctional Facilities In The Shadow Of COVID-19: Unique Challenges And Proposed Solutions. *Health Affairs Forefront*.
- [87] Carlos Franco-Paredes, Nazgol Ghandnoosh, Hassan Latif, Martin Krsak, Andres F Henao-Martinez, Megan Robins, Lilian Vargas Barahona, and Eric M Poeschla. Decarceration and community re-entry in the COVID-19 era. *The Lancet Infectious Diseases*, 21(1):e11–e16, January 2021.
- [88] Benjamin A. Howell, Haiyan Ramirez Battle, Cyrus Ahalt, Shira Shavit, Emily A. Wang, Nickolas Zaller, and Brie A. Williams. Protecting Decarcerated Populations In The Era of COVID-19: Priorities For Emergency Discharge Planning. *Health Affairs Forefront*.
- [89] Brie Williams. No Excuses: Governors Must Pursue Decarceration Along with Investments in Reentry Services.
- [90] Massimiliano Esposito, Monica Salerno, Nunzio Di Nunno, Federica Ministeri, Aldo Liberto, and Francesco Sessa. The Risk of COVID-19 Infection in Prisons and Prevention Strategies: A Systematic Review and a New Strategic Protocol of Prevention. *Healthcare (Basel, Switzerland)*, 10(2):270, January 2022.
- [91] Brandy F Henry. Reducing COVID-19 outbreaks in prisons through public health-centred policies. *The Lancet Public Health*, 6(10):e701–e702, October 2021.
- [92] Sabrina S. Rapisarda, James Byrne, and Lina Marmolejo. An Examination of COVID-19 Outbreaks in Prisons and Jails in North America, Central America, and the Caribbean. *Victims & Offenders*, 15(7-8):1234–1243, October 2020. Publisher: Routledge \_eprint: <https://doi.org/10.1080/15564886.2020.1835766>.
- [93] ANNA Harvey, ORION Taylor, and ANDREA Wang. COVID-19, jails, and public safety. *Washington, DC: Council on Criminal Justice*, 2020.
- [94] Pandemic inspires new push to shrink jails and prisons.

- [95] Carlos Franco-Paredes, Katherine Jankousky, Jonathan Schultz, Jessica Bernfeld, Kimberly Cullen, Nicolas G. Quan, Shelley Kon, Peter Hotez, Andrés F. Henao-Martínez, and Martin Krsak. COVID-19 in jails and prisons: A neglected infection in a marginalized population. *PLOS Neglected Tropical Diseases*, 14(6):e0008409, June 2020. Publisher: Public Library of Science.
- [96] Rita Rubin. The Challenge of Preventing COVID-19 Spread in Correctional Facilities. *JAMA*, 323(18):1760–1761, May 2020.
- [97] Alexandria Macmadu, Justin Berk, Eliana Kaplowitz, Marquisele Mercedes, Josiah D. Rich, and Lauren Brinkley-Rubinstein. COVID-19 and mass incarceration: a call for urgent action. *The Lancet Public Health*, 5(11):e571–e572, November 2020. Publisher: Elsevier.
- [98] Alan G. Hawkes. Spectra of some self-exciting and mutually exciting point processes. *Biometrika*, 58(1):83–90, 1971.
- [99] J. Daniel Kelly, Junhyung Park, Ryan J. Harrigan, Nicole A. Hoff, Sarita D. Lee, Rae Wannier, Bernice Selo, Mathias Mossoko, Bathe Njolo, Emile Okitolonda-Wemakoy, Placide Mbala-Kingebeni, George W. Rutherford, Thomas B. Smith, Steve Ahuka-Mundeke, Jean Jacques Muyembe-Tamfum, Anne W. Rimoin, and Frederic Paik Schoenberg. Real-time predictions of the 2018–2019 Ebola virus disease outbreak in the Democratic Republic of the Congo using Hawkes point process models. *Epidemics*, 28:100354, September 2019.
- [100] Sebastian Meyer, Johannes Elias, and Michael Höhle. A Space–Time Conditional Intensity Model for Invasive Meningococcal Disease Occurrence. *Biometrics*, 68(2):607–616, 2012. [eprint: https://onlinelibrary.wiley.com/doi/pdf/10.1111/j.1541-0420.2011.01684.x](https://onlinelibrary.wiley.com/doi/pdf/10.1111/j.1541-0420.2011.01684.x).
- [101] Junhyung Park, Adam W Chaffee, Ryan J Harrigan, and Frederic Paik Schoenberg. A non-parametric hawkes model of the spread of ebola in west africa. *Journal of Applied Statistics*, 49(3):621–637, 2022. Publisher: Taylor & Francis.
- [102] Frederic Paik Schoenberg, Marc Hoffmann, and Ryan J. Harrigan. A recursive point process model for infectious diseases. *Annals of the Institute of Statistical Mathematics*, 71(5):1271–1287, October 2019.

- [103] Christophe Fraser. Estimating individual and household reproduction numbers in an emerging epidemic. *PLoS ONE*, 2007.
- [104] Åke Svensson. A note on generation times in epidemic models. *Mathematical Biosciences*, 208(1):300–311, July 2007.

## Appendix

### A Model Details

#### A.1 Hawkes Processes

To estimate the effects of multiple sets of infected cases on one another through time, one can use a Hawkes (or *self-exciting*) process [98–102]. This is equivalent to a branching process, or the assumptions made in *e.g.* [103]; Hawkes himself used measles contagion as an example of a self-exciting process.

Hawkes processes assume an intensity function that increases and decreases in proportion to the number of events that have occurred in the past (*e.g.* infections are caused by previously infected individuals): if  $N([a, b]) = (\# \text{ of infection events at times } t \in [a, b])$  is the empirical measure of the point process, with

$$N(dt) = \begin{cases} 1 & \text{if an event happens in } [t, t + dt), \text{ or} \\ 0 & \text{otherwise,} \end{cases}$$

then the intensity function is

$$\begin{aligned} h(t) &= \mu(t) + \int_0^t \nu(t-s) N(ds) \\ &= \mu(t) + \sum_{t_i < t} \nu(t-t_i), \end{aligned}$$

where  $t_i$  are the event times in  $[0, t)$ . Here,  $\mu(t)$  is an external or deterministic component of the intensity, whereas  $\nu(t)$  measures the contribution of past events to the rate of new events. Writing  $N(t) = N([0, t])$  and letting  $P(t)$  be a standard Poisson process, we have

$$N(t) = P\left(\int_0^t \mu(s) ds + \int_0^t \int_0^s \nu(s-u) N(du) ds\right).$$

More generally, we can consider mutually exciting processes,  $N_i(dt)$ ,  $i = 1, \dots, m$ , with intensities

$$h_i(t) = \mu_i(t) + \sum_{j=1}^m \int_0^t \nu_{ji}(t-s) N_j(ds).$$

## A.2 Discrete-Time Hawkes Processes

Implicit in the definition of Hawkes processes is the assumption that one can always resolve the timing of each event, so that no two events are simultaneous. Here, the data consists a series of daily case counts  $X_i(t)$  of each type, and multiple cases are commonly observed each day, so we must define a discrete-time version of the Hawkes process to proceed.

Informally, the Hawkes process is such that  $\Delta N_i(t) = N_i(t + \Delta t) - N_i(t)$  is Poisson distributed with rate  $h_i(t) \Delta t$ , where  $h_i(t)$  depends (only) on events up to time  $t$ , whereas the probability of multiple events in the interval  $[t, t + \Delta t)$  is of order  $(\Delta t)^2$ , which becomes negligible as  $\Delta t \rightarrow 0$ .

We measure time so that  $\Delta t$  is one day, and thus cannot neglect the possibility of multiple events on a single day, and thus define our process  $N_i(t)$ ,  $t = 0, 1, \dots$  assuming  $N_i(0)$  is given, whereas  $\Delta N_i(t) = N_i(t + 1) - N_i(t)$  is Poisson distributed with rate

$$h_i(t) = \mu_i(t) + \sum_{j=1}^m \sum_{s=0}^{t-1} \nu_{ji}(t-s) \Delta N_j(s),$$

where we can understand the latter terms as the discrete equivalents of the integrals  $\int_0^t \nu_{ji}(t-s) N_j(ds)$ . By definition,  $N_i(t) = N_i(0) + \sum_{s=0}^{t-1} \Delta N_i(s)$ .

The probability that  $\Delta N_i(t) = n_{it}$  is then

$$\frac{(h_i(t))^{n_{it}} e^{-h_i(t)}}{n_{it}!}$$

and the log likelihood for a vector of parameters  $\Theta$  given  $\mathbf{N} = (N_1, \dots, N_m)$  is thus

$$\ell(\Theta; \mathbf{N}) = \sum_{i=1}^m \left( \sum_t \log(h_i(t)) \Delta N_i(t) - \sum_t h_i(t) - \sum_t \log(\Delta N_i(t)!) \right).$$

## A.3 Detection Delays

Inference of transmission dynamics may be affected by the timing of cases' inclusion in case counts relative to the date of their infection, if the interval from infection to case reporting date is variable.

Let each case, identified by an index  $x$ , be infected on day  $t_x$  and included in case counts for day  $t'_x = t_x + d_x$ , where  $d_x$  has probability mass function  $p_d(s)$ ,  $s = 0, 1, \dots$ . Let  $X_i(t)$  denote the reported case count on day  $t$  while  $\Delta N_i(t) = N_i(t+1) - N_i(t)$  is the number of cases infected on day  $t$ . The case counts on day  $t$  are then

$$\begin{aligned} X_i(t) &= \#\{x \mid t'_x = t\} \\ &= \sum_{k \geq 0} \#\{x \mid t_x = t - k, d_x = k\} \\ \mathbb{E}[X_i(t)] &= \sum_{k \geq 0} \Delta N_i(t - k) p_d(k). \end{aligned}$$

We approximate this process by using a serial interval distribution relating case detections to previous detections. Case detections on day  $t$  are generated at rate

$$\sum_k h_i(t - k) p_d(k) = \sum_k \left( \mu_i(t - k) + \sum_j \sum_{s=0}^{t-k-1} \nu_{ij}(t - k - s) \Delta N_j(s) \right) p_d(k).$$

Given a case detected on day  $s$ , the probability [69, 104] that a given one of its secondary cases is detected on day  $t$  is

$$\begin{aligned} &\mathbb{P}(t_y + d_y = t \mid x \rightarrow y, t_x + d_x = s) \\ &= \sum_{t_1} \mathbb{P}(t_x = t_1 \mid t_x + d_x = s) \sum_{t_2} \mathbb{P}(t_y = t_2 \mid x \rightarrow y, t_x = t_1) \mathbb{P}(t_y + d_y = t \mid t_y = t_2). \end{aligned}$$

Two of those probabilities are given by distributions already defined:

$$\begin{aligned} \mathbb{P}(t_y = t_2 \mid x \rightarrow y, t_x = t_1) &= \nu_{ij}(t_2 - t_1) \\ \mathbb{P}(t_y + d_y = t \mid t_y = t_2) &= p_d(d_y). \end{aligned}$$

The other one is a *backward detection interval* probability [69]:

$$\mathbb{P}(t_x = t_1 \mid t_x + d_x = s) = \frac{\Delta N_i(t_1) p_d(s - t_1)}{\sum_{t'} \Delta N_i(t') p_d(s - t')}.$$

The true daily incidences  $\Delta N$  being unobserved, we approximate by assuming the true incidence curve rises and falls as the reporting curve does with a lag,  $\Delta N_i(t) \propto X_i(t + \bar{d})$ , with  $\bar{d}$  the nearest integer to the mean reporting delay:

$$\mathbb{P}(t_x = t_1 \mid t_x + d_x = s) \approx \frac{X_i(t_1 + \bar{d}) p_d(s - t_1)}{\sum_{t'} X_i(t' + \bar{d}) p_d(s - t')}.$$

Using that, we can model the cases recorded on day  $t$  as being generated on day  $t$  at rate

$$\begin{aligned} h'_i(t) &= \sum_{k=0}^t p_d(k) \left( \mu_i(t-k) + \sum_j \sum_{s=0}^{\infty} \sum_{k'=0}^{\infty} \frac{X_j(s-k'+\bar{d}) p_d(k')}{\sum_{k''} X_j(s-k''+\bar{d}) p_d(k'')} \nu_{ij}(t-k-(s-k')) [X_j(s) - \mathbf{1}[j=i, s=t]] \right) \\ &= \rho_i(t) + \sum_j \sum_{s=0}^{\infty} \sigma_{ji}(t-s; s) [X_j(s) - \mathbf{1}[j=i, s=t]], \end{aligned}$$

with

$$\begin{aligned} \rho_i(t) &= \sum_{k=0}^t \mu_i(t-k) p_d(k), \\ \sigma_{ji}(\Delta t; s) &= \sum_{k=0}^{\infty} \sum_{k'=k-\Delta t+1}^{\infty} \nu_{ji}(\Delta t-k+k') p_d(k) \frac{X_j(s-k'+\bar{d}) p_d(k')}{\sum_{k''} X_j(s-k''+\bar{d}) p_d(k'')}. \end{aligned}$$

We use this to define an adjusted likelihood function:

$$\ell(\Theta; \mathbf{X}) = \sum_i \sum_t \left( \log(h'_i(t)) X_i(t) - h'_i(t) - \log(X_i(t)!) \right).$$

#### A.4 Application to Case Counts

When the process is represented by a series of daily case counts  $X_i(t)$  ( $t = 0, \dots, T$ ) of each type, we have a log likelihood function

$$\ell(\Theta; \mathbf{X}) = \sum_{i=1}^m \left( \sum_t \log(h'_i(t)) X_j(t) - \sum_t h'_i(t) - \sum_t \log(X_j(t)!) \right)$$

with

$$h'_i(t) = \rho_i(t) + \sum_{j=1}^m \sum_s \sigma_{ji}(t-s; s) X_j(s).$$

For our purposes, we will assume mutually exciting groups are the number of infected staff at each correctional facility and the number of infected residents at each correctional facility. We will include the number of infected members of each county excluding prison residents and staff as an external source of hazard.

We write  $X_i^R(t)$  and  $X_i^S(t)$  for the daily number of cases reported in residents and staff, respectively, at the  $i^{\text{th}}$  facility,  $i = 1, \dots, m_f$  (where  $m_f$  is the number of facilities). For the functions  $\sigma_{ij}$ , we use a common generation interval distribution  $\nu(\Delta t)$  and detection delay distribution  $p_d(\Delta t)$  to determine the contribution of each past infection to the present force of infection. Assume that

infectious contacts between residents of facility  $i$  and facility  $j$  occur at rate  $\beta_{ij}$  (with units of events per unit time), so that the contribution of the former to infection of the latter on day  $t$  is  $\beta_{ij} \sum_{s=0}^T \sigma_{ij}(t-s; s) X_i^R(s)$ . Similarly, assume that infective contacts between staff at facility  $i$  and residents at facility  $j$  occur at rate  $\gamma_{ij}$ , such that its contribution to the infection of residents of facility  $j$  is  $\gamma_{ij} \sum_{s=0}^T \sigma_{ij}(t-s; s) X_i^S(s)$ . Assume that infective contacts between staff of facility  $i$  and facility  $j$  occur at rate  $\zeta_{ij}$ , so that the contribution to infection of staff of facility  $j$  due to residents and staff of facility  $i$  is  $\gamma_{ji} \sum_{s=0}^T \sigma_{ij}(t-s; s) X_i^R(s) + \zeta_{ij} \sum_{s=0}^T \sigma_{ij}(t-s; s) X_i^S(s)$ .

Finally, we model transmission between the community and the prisons. In this study we consider only transmission into the prisons, not to or between community members, and we assume that all transmission from outside the prison system is from the California county populations. Let  $\psi_{ki}$  denote the contact rate between residents of prison  $i$  and county  $k$ , and let  $\xi_{ki}$  denote the contact rate between staff of prison  $i$  and county  $k$ . Denote the daily number of (non-prison) cases in county  $k$  by  $X_k^C(t)$ ,  $k = 1, \dots, m_c$ , where  $m_c$  is the number of counties.

We then write the total intensity for residents in prison  $j$ , including transmission from residents, staff, and the surrounding community:

$$h_j^R(t) = \sum_{i=1}^{m_f} \sum_{s=0}^T \beta_{ij} \sigma_{ij}(t-s; s) X_i^R(s) + \sum_{i=1}^{m_f} \sum_{s=0}^T \gamma_{ij} \sigma_{ij}(t-s; s) X_i^S(s) + \sum_{k=1}^{m_c} \sum_{s=0}^T \psi_{kj} \sigma_{ij}(t-s; s) X_k^C(s).$$

For the intensity for staff in prison  $j$ , we have

$$h_j^S(t) = \sum_{i=1}^{m_f} \sum_{s=0}^T \gamma_{ji} \sigma_{ij}(t-s; s) X_i^R(s) + \sum_{i=1}^{m_f} \sum_{s=0}^T \zeta_{ij} \sigma_{ij}(t-s; s) X_i^S(s) + \sum_{k=1}^{m_c} \sum_{s=0}^T \xi_{kj} \sigma_{ij}(t-s; s) X_k^C(s).$$

For simplicity, we will assume that  $\beta_{ij} = \beta_w$  when  $i = j$  (within facility) and  $\beta_{ij} = \beta_b$  when  $i \neq j$  (between facilities); we use analogous notation for  $\gamma_w, \gamma_b, \zeta_w, \zeta_b$ . Similarly we model the parameters  $\psi$  and  $\xi$  as  $\psi_w$  and  $\xi_w$  between a facility and the county containing that facility, and  $\psi_b$  and  $\xi_b$  between a facility and all other counties. Let the parameters be written as a vector  $\Theta = (\beta_w, \beta_b, \gamma_w, \gamma_b, \zeta_w, \zeta_b, \psi_w, \psi_b, \xi_w, \xi_b)$ . We denote the entire collection of observations  $X_i^R(t), X_i^S(t), X_k^C(t)$  for all  $i, k, t$  as  $\mathbf{X}$ . The log likelihood for the parameters is then

$$\begin{aligned} \ell(\Theta; \mathbf{X}) = & \sum_{i=1}^{m_f} \sum_t \log(h_i^R(t)) X_i^R(t) + \sum_{i=1}^{m_f} \sum_t \log(h_i^S(t)) X_i^S(t) \\ & - \sum_{i=1}^{m_f} \sum_t h_i^R(t) - \sum_{i=1}^{m_f} \sum_t h_i^S(t) - \sum_{i=1}^{m_f} \sum_{\tau=0}^t \log(X_i^R(\tau)!) - \sum_{i=1}^{m_f} \sum_{\tau=0}^t \log(X_i^S(\tau)!). \end{aligned}$$

This log likelihood function is used to fit the parameter vector  $\Theta$  using maximum likelihood estimation.

Given a parameter estimate  $\Theta$ , the contribution of each source population to transmission to residents or staff is estimated by its contribution to their total Hawkes process intensity over time, *e.g.*  $\sum_{t=0}^T \sum_{j=1}^{m_f} \sum_{s=0}^T \beta_w \sigma_{jj}(t-s; s) X_j^R(s)$  for within-facility transmission from residents to residents. The proportion of transmission from each source is estimated by the absolute contribution divided by the maximum likelihood estimate of the total Hawkes intensity to residents or staff.

## A.5 Nested models

The independent prisons model was implemented by defining the between-prison parameters  $\beta_b$ ,  $\gamma_b$ , and  $\zeta_b$  to equal zero. The remaining parameters were used in fitting.

The well-mixed prisons model was implemented by constraining  $\beta_w = \gamma_w = \zeta_w$ ,  $\beta_b = \gamma_b = \zeta_b$ ,  $\psi_w = \xi_w$ ,  $\psi_b = \xi_b$ , and using the remaining free parameters  $\beta_w$ ,  $\beta_b$ ,  $\psi_w$ ,  $\psi_b$  in fitting.

## B Detailed transmission intensities

Figures B.1–B.6 detail the estimated intensities of transmission to prison residents and staff attributes to various sources, under the full and nested models described above.

## C Abbreviations for CDCR facilities

Table C.1 lists the names and abbreviations used for CDCR’s facilities.



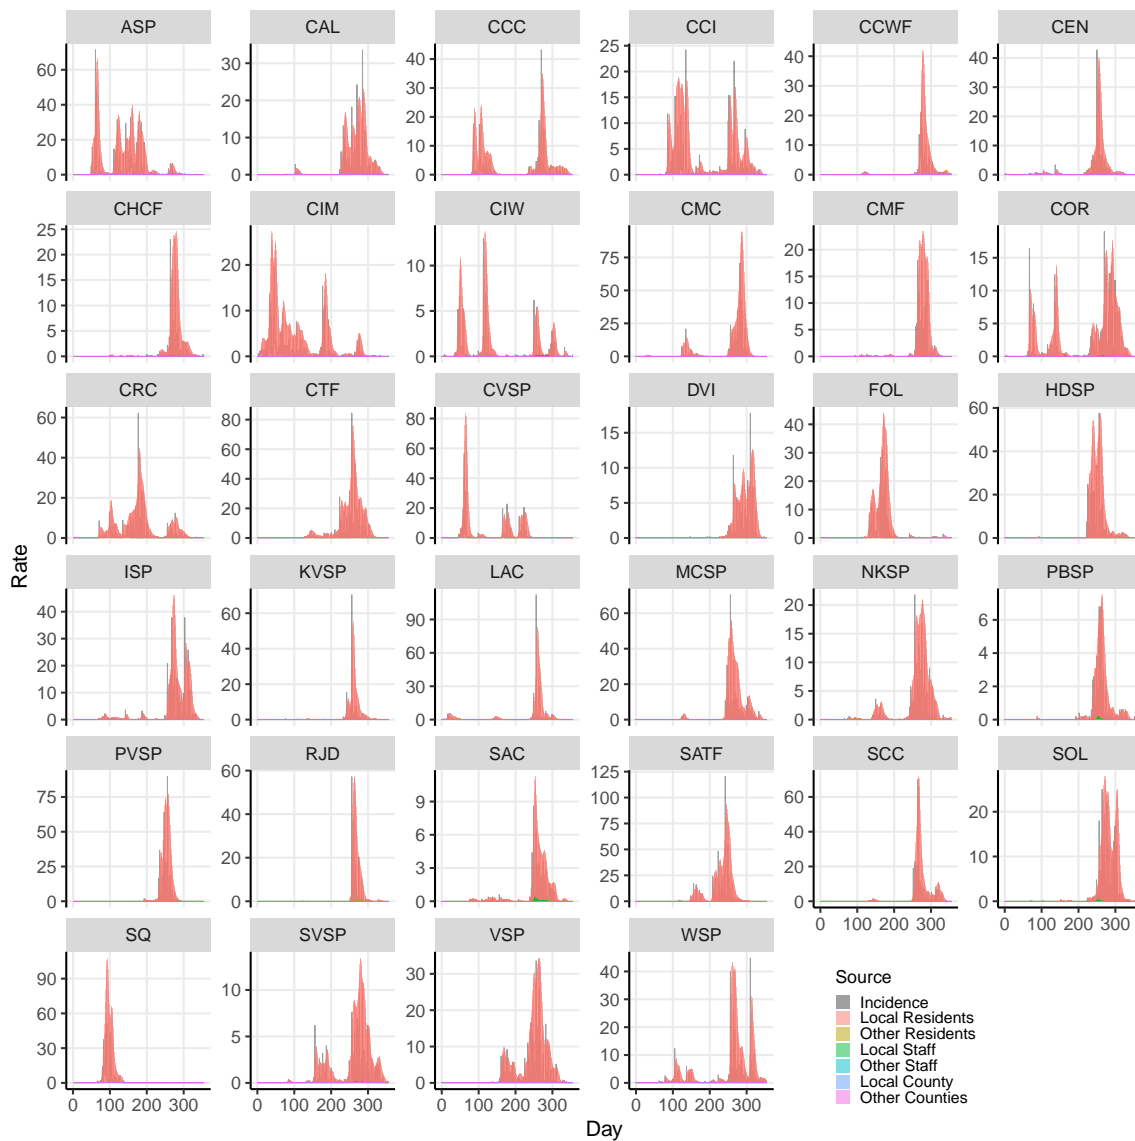

Figure B.1: Incidence rates (gray) and intensities (colors, stacked) for resident cases by facility, in the maximum likelihood estimate for the full Hawkes process model.

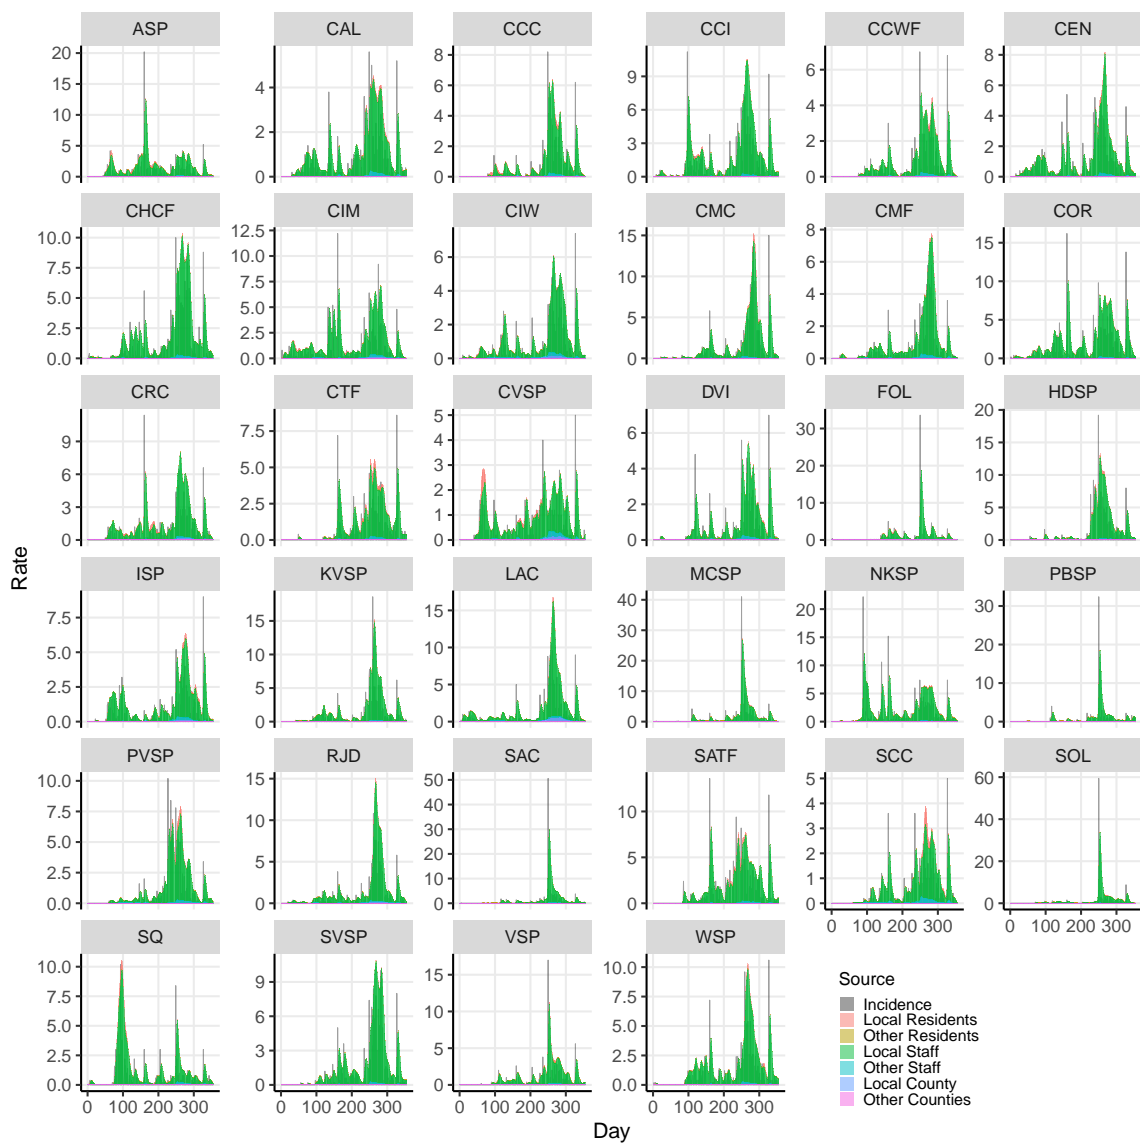

Figure B.2: Incidence rates (gray) and intensities (colors, stacked) for staff cases by facility, in the maximum likelihood estimate for the full Hawkes process model.

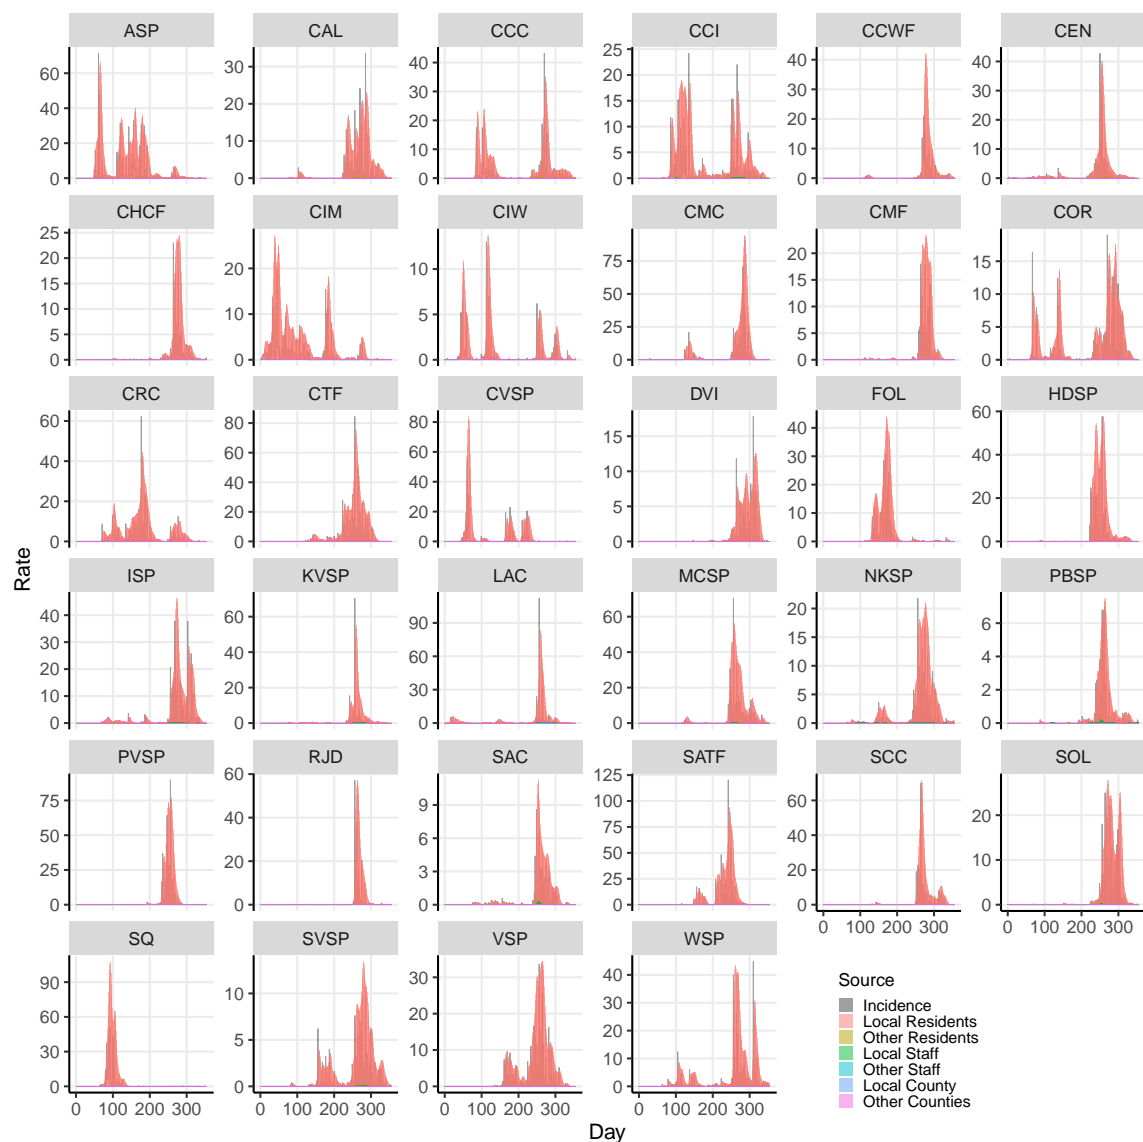

Figure B.3: Incidence rates (gray) and intensities (colors, stacked) for resident cases by facility, in the maximum likelihood estimate for the independent prisons nested model, with local transmission only.

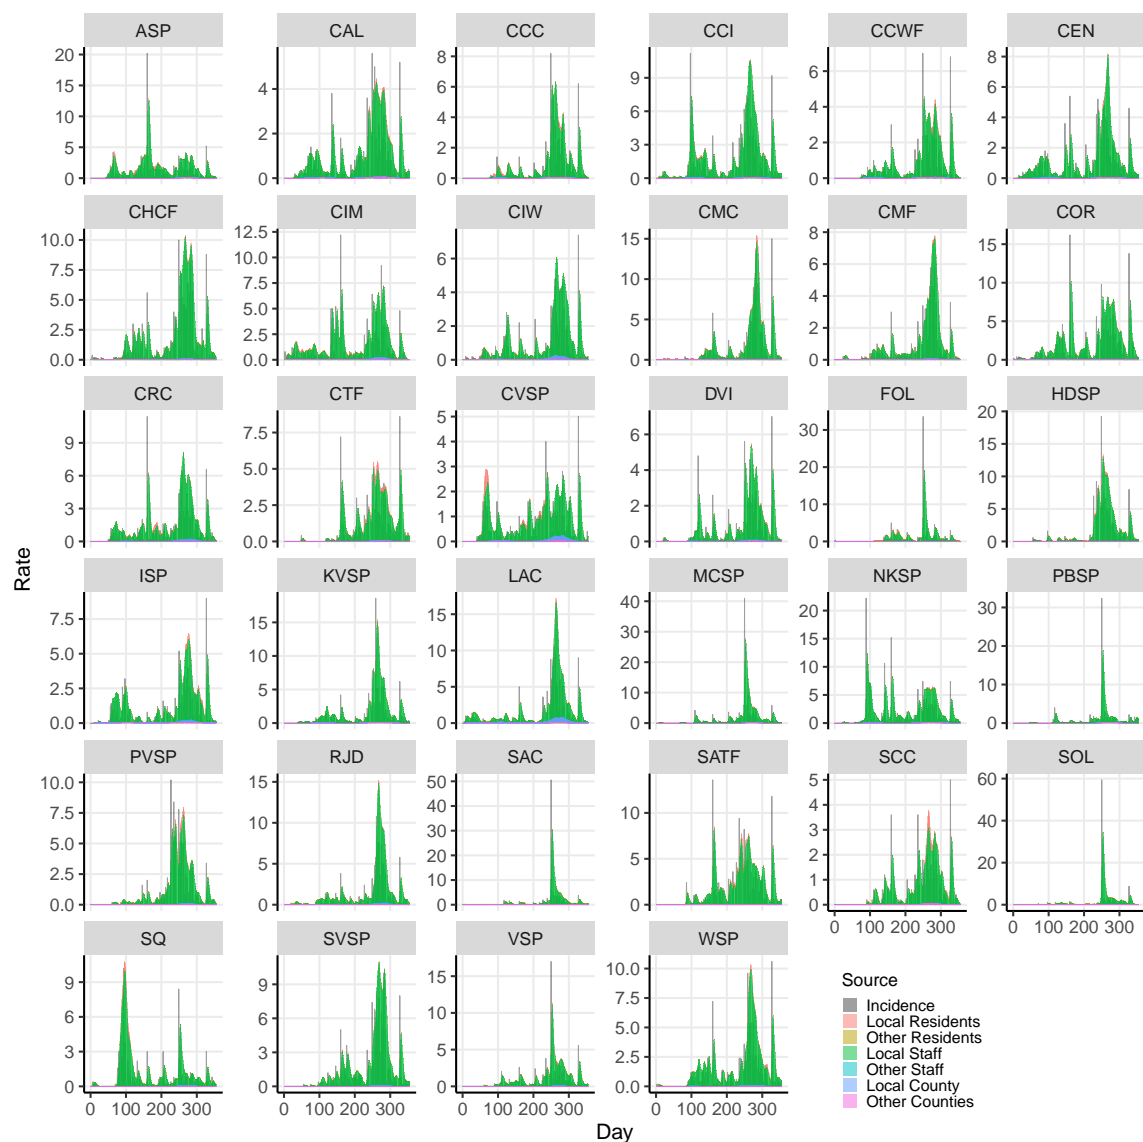

Figure B.4: Incidence rates (gray) and intensities (colors, stacked) for staff cases by facility, in the maximum likelihood estimate for the independent prisons nested model, with local transmission only.

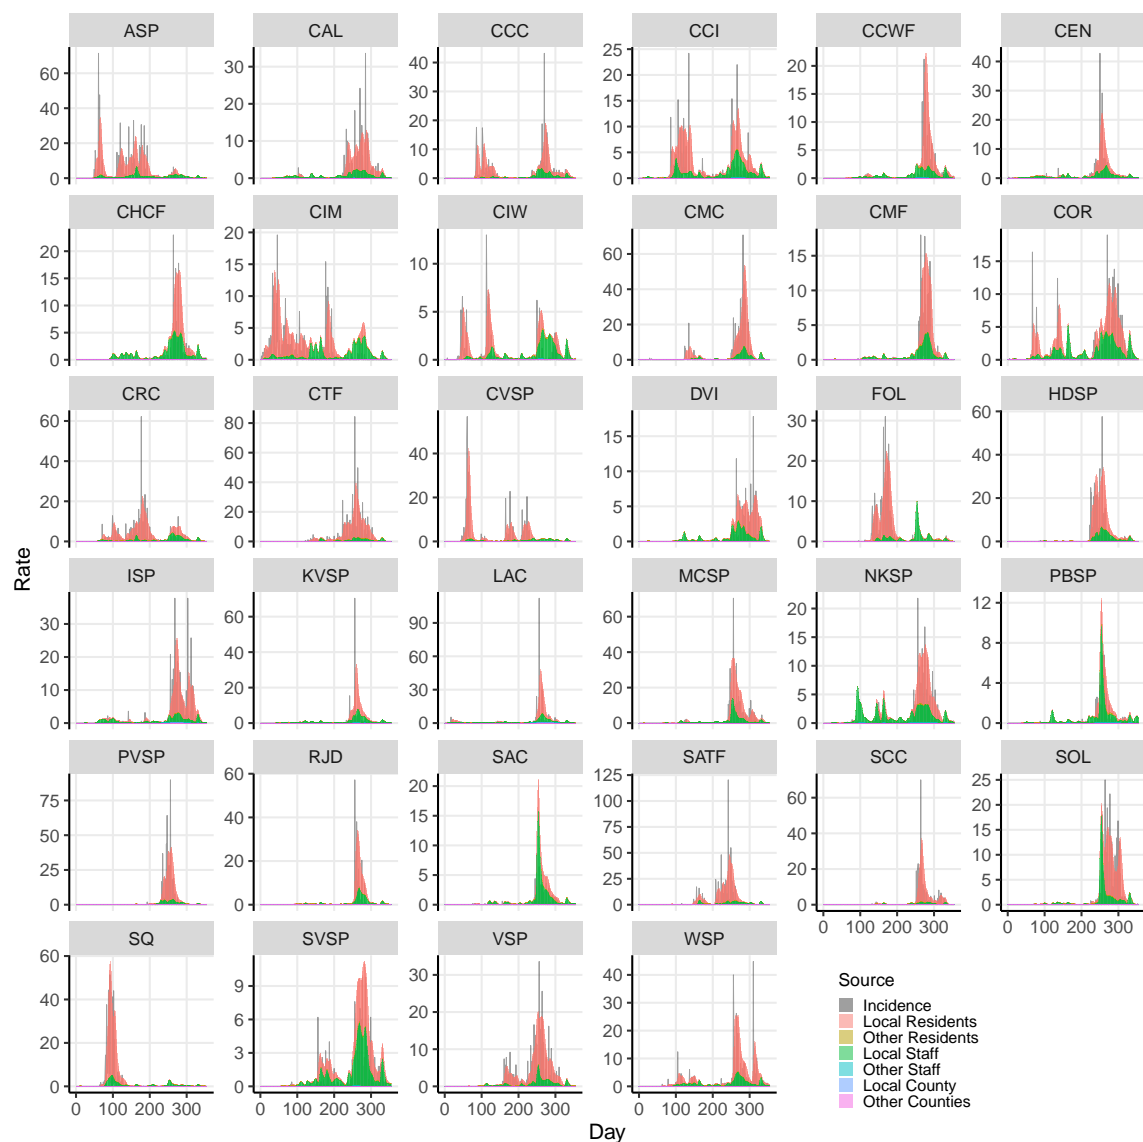

Figure B.5: Incidence rates (gray) and intensities (colors, stacked) for resident cases by facility, in the maximum likelihood estimate for the well-mixed prisons nested model, with staff and resident exposures assumed identical.

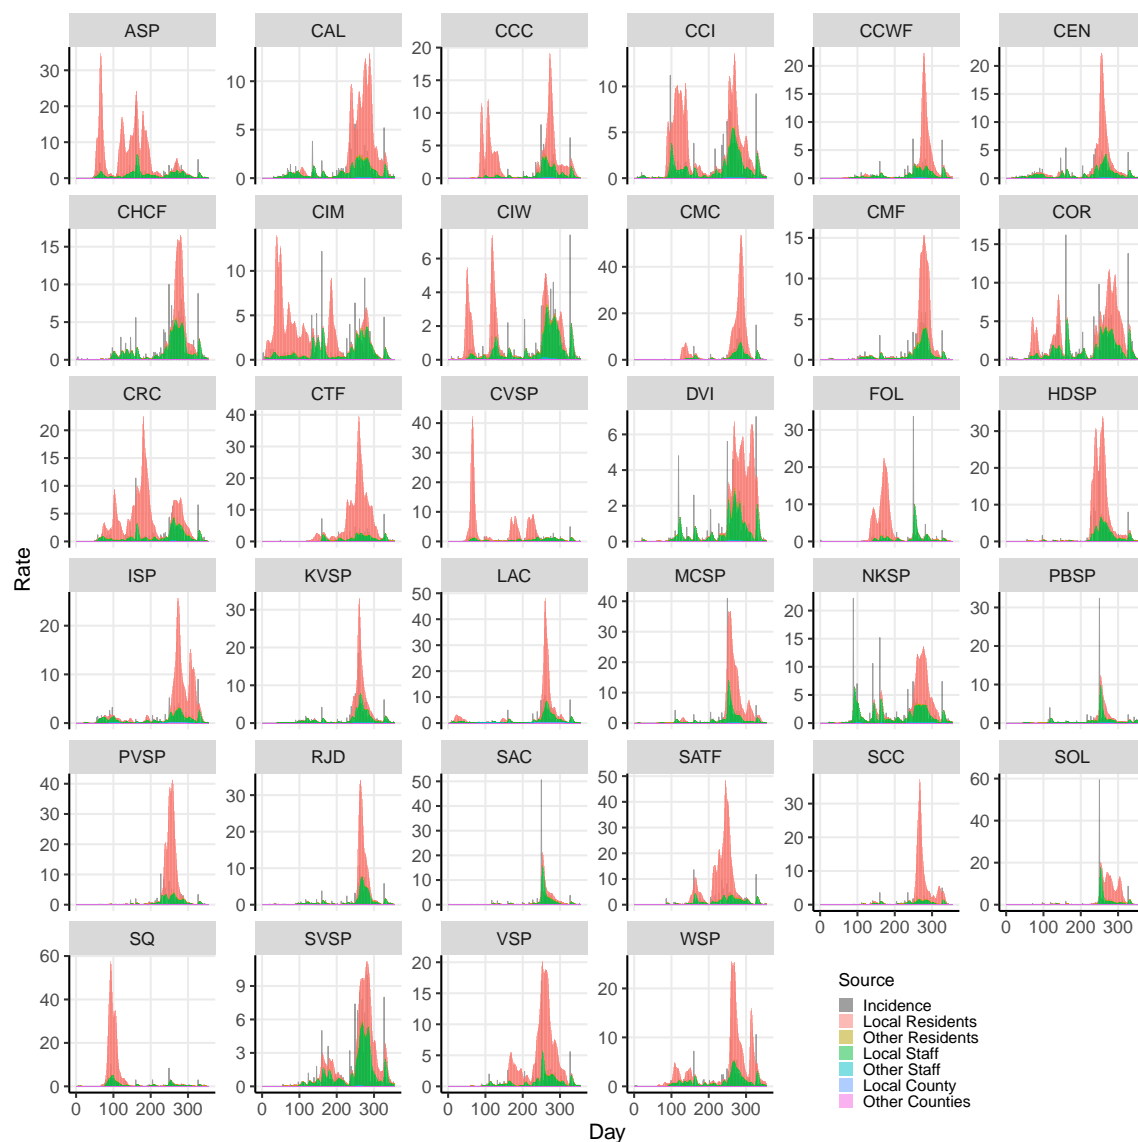

Figure B.6: Incidence rates (gray) and intensities (colors, stacked) for staff cases by facility, in the maximum likelihood estimate for the well-mixed prisons nested model, with staff and resident exposures assumed identical.

Table C.1: Abbreviated names of CDCR facilities.

| Abbreviation | Facility                                      |
|--------------|-----------------------------------------------|
| ASP          | Avenal State Prison                           |
| CAL          | Calipatria State Prison                       |
| CCC          | California Correctional Center                |
| CCI          | California Correctional Institution           |
| CCWF         | Central California Women's Facility           |
| CEN          | Centinela State Prison                        |
| CHCF         | California Health Care Facility - Stockton    |
| CIM          | California Institution for Men                |
| CIW          | California Institution for Women              |
| CMC          | California Men's Colony                       |
| CMF          | California Medical Facility                   |
| COR          | California State Prison Corcoran              |
| CRC          | California Rehabilitation Center              |
| CTF          | Correctional Training Facility                |
| CVSP         | Chuckawalla Valley State Prison               |
| DVI          | Deuel Vocational Institution                  |
| FOL          | Folsom State Prison                           |
| HDSP         | High Desert State Prison                      |
| ISP          | Ironwood State Prison                         |
| KVSP         | Kern Valley State Prison                      |
| LAC          | California State Prison Los Angeles County    |
| MCSP         | Mule Creek State Prison                       |
| NKSP         | North Kern State Prison                       |
| PBSP         | Pelican Bay State Prison                      |
| PVSP         | Pleasant Valley State Prison                  |
| RJD          | RJ Donovan Correctional Facility              |
| SAC          | California State Prison Sacramento            |
| SATF         | California Substance Abuse Treatment Facility |
| SCC          | Sierra Conservation Center                    |
| SOL          | California State Prison Solano                |
| SQ           | San Quentin State Prison                      |
| SVSP         | Salinas Valley State Prison                   |
| VSP          | Valley State Prison                           |
| WSP          | Wasco State Prison                            |
